# Supplementary material for: Endoscopic Contrast-Enhanced Ultrasound and Fine-Needle Aspiration or Biopsy for the Diagnosis of Pancreatic Solid Lesions: A Systematic Review and Meta-Analysis
Source: MDPI journal article supplement (doi:10.3390/cancers16091658), 2024-04-25
Supplement: s1 [file s1]

Table S1: Search Terms and Search Strategy

| Pubmed                                         |                                                                                                                                                                            |
|------------------------------------------------|----------------------------------------------------------------------------------------------------------------------------------------------------------------------------|
| <b>Concept 1: Pancreatic neoplasm</b>          | ("Pancreatic Cyst"[Mesh]) OR "Pancreatic Neoplasms"[Mesh] OR "Pancreatic Adenocarcinoma") OR "Pancreatitis"[Mesh] OR "Pancreatic NET" OR "Pancreatic Neuroendocrine Tumor" |
| <b>Concept 2: Ultrasound</b>                   | ultrasonograph* OR ultrasound OR sonogra* OR endosonograph*                                                                                                                |
| <b>Concept 3: Contrast Enhanced Ultrasound</b> | ("contrast-enhanced" OR "contrast-enhanced" OR "contrast medium" OR "contrast agent*" OR "echo-enhanced") OR "CEUS" OR "ECEUS"                                             |
| <b>Combination of concepts</b>                 | (Concept 1) AND (Concept 2) AND (Concept 3)                                                                                                                                |
| Embase                                         |                                                                                                                                                                            |
| <b>Concept 1: Pancreatic neoplasm</b>          | “pancreatic cyst”:ab,ti OR “pancreatic neoplasm”:ab,ti OR “pancreatic adenocarcinoma”:ab,ti OR “pancreatic net” OR “pancreatic neuroendocrine tumor”:ab,ti                 |
| <b>Concept 2: Ultrasound</b>                   | 'ultrasonograph*':ab,ti OR 'ultrasound':ab,ti OR 'sonograph*':ab,ti OR 'endosonograph*':ab,ti                                                                              |
| <b>Concept 3: Contrast Enhanced Ultrasound</b> | 'echo-enhanced':ab,ti OR 'contrast agent':ab,ti OR 'contrast enhanced':ab,ti OR 'ceus':ab,ti OR 'eceus':ab,ti                                                              |
| <b>Combination of concepts</b>                 | (Concept 1) AND (Concept 2) AND (Concept 3)                                                                                                                                |
| Web of Science                                 |                                                                                                                                                                            |
| <b>Concept 1: Pancreatic neoplasm</b>          | TS = "Pancreatic Cyst" OR "Pancreatic adenocarcinoma" OR "Pancreatic Neoplasm" OR "Pancreatic NET" OR "Pancreatic neuroendocrine tumor"                                    |
| <b>Concept 2: Ultrasound</b>                   | TS = "Ultrasonograph*" OR "ultrasound" OR "sonogra*" OR "endosonograph*"                                                                                                   |
| <b>Concept 3: Contrast Enhanced Ultrasound</b> | TS = "contrast enhanced" OR "contrast agent" OR "echo-enhanced" OR "CEUS" OR “ECEUS”                                                                                       |
| <b>Combination of concepts</b>                 | (Concept 1) AND (Concept 2) AND (Concept 3)                                                                                                                                |
